# Supplementary material for: Molecular symmetry effect on the morphology and self-aggregation of semiconducting polymers
Source: Royal Society of Chemistry journal article supplement (doi:10.1039/d2py01219g), 2022-12-14
Supplement: d2py01219g1.pdf [file d2py01219g1.pdf]

Supporting Information

*for*

# Molecular Symmetry Effect on Morphology and Self-aggregation of Semiconducting Polymers

*Sang Ah Park,<sup>‡a</sup> Do Hui Kim,<sup>‡b</sup> Yelim Choi,<sup>a</sup> Dae Hwan Lee,<sup>a</sup> Taiho Park,<sup>\*a</sup> Shinuk Cho,<sup>\*b</sup>  
and Minjun Kim<sup>\*a</sup>*

<sup>a</sup> Department of Chemical Engineering, Pohang University of Science and Technology, San 31, Nam-gu, Pohang, Gyeongbuk 37673, Republic of Korea

<sup>b</sup> Department of Physics and Energy Harvest Storage Research Center, University of Ulsan, Ulsan 44610, Republic of Korea

## Contents

1. **Experimental section**
2. **Figure S1.** <sup>1</sup>H/<sup>13</sup>C nuclear magnetic resonance (NMR) spectroscopy of all the compounds.
3. **Figure S2.** Cyclic voltammograms (CV) of the second reduction cycles of (a) **PNDITVT**, (b) **asy-PNDI1FTVT**, and (c) **PNDI2FTVT**.
4. **Figure S3.** Space charge limited current (SCLC) mobility plots of three acceptor polymers.
5. **Figure S4.** Gel permeation chromatographs of PNDITVT, asy-PNDI1FTVT and PNDI2FTVT.
6. **Figure S5.** Differential Scanning Calorimeter thermograms of three copolymers.
7. **Figure S6.** Optimized four model compounds (a) **NDITVT** (b) **NDI1FTVT-3,3** containing fluorine atoms at 3,3 positions, (c) **NDI1FTVT-3,8** containing fluorine atoms at 3,8 positions, and (d) **NDI2FTVT**.
8. **Figure S7.** Jablonski diagram of asy-PNDI1FTVT.
9. **Figure S8.** Contact angle measurement of PTB7-Th, PNDITVT, asy-PNDI1FTVT, and PNDI2FTVT (average value of 5 drops of each solvent).

## 1. Experimental section

### Materials

All reagents and chemicals were purchased from commercial sources Sigma-Aldrich and Suna Tech Inc. unless specified. (*E*)-1,2-bis(5-(trimethylstannyl)thiophen-2-yl)ethene (TVT), (*E*)-(4-fluoro-5-(2-(5-(trimethylstannyl)thiophen-2-yl)vinyl)thiophen-2-yl)trimethylstannane (asy-1FTVT), and (*E*)-1,2-bis(3-fluoro-5-(trimethylstannyl)thiophen-2-yl)ethane (2FTVT) are synthesized by following the methods and reported literatures.<sup>1</sup>

### Device fabrication

Organic solar cells were fabricated with inverted structure (ITO/ZnO/active layer/MoO<sub>3</sub>/Ag). The ITO substrate was cleaned with ultra sonication with acetone and IPA for 10 min each and dried in a hot oven. Then, the cleaned ITO substrate was treated by UV ozone for 30 min. ZnO precursor was spin coated on ITO substrates and annealed at 200°C for 10 min. A blend of PTB7-Th:NDI-based copolymers was dissolved in CF (1:1.5 w:w) with concentration of 18 mg/ml. Then, this blend solution with 0.5% CN was spin coated on ZnO layer in N<sub>2</sub>-filled glove box. The MoO<sub>3</sub> and Ag was deposited by thermal evaporation on the active layer under 2\*10<sup>-6</sup> Torr.

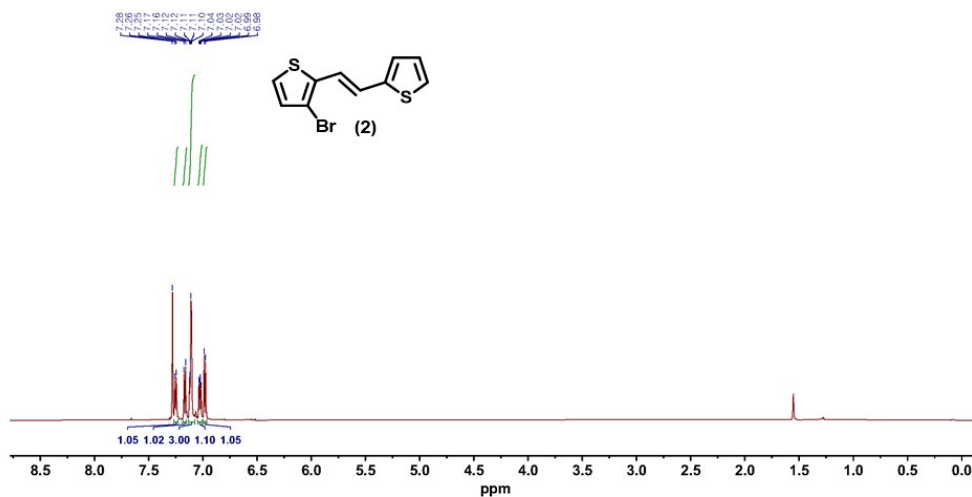

<sup>1</sup>H-NMR spectrum of (2)

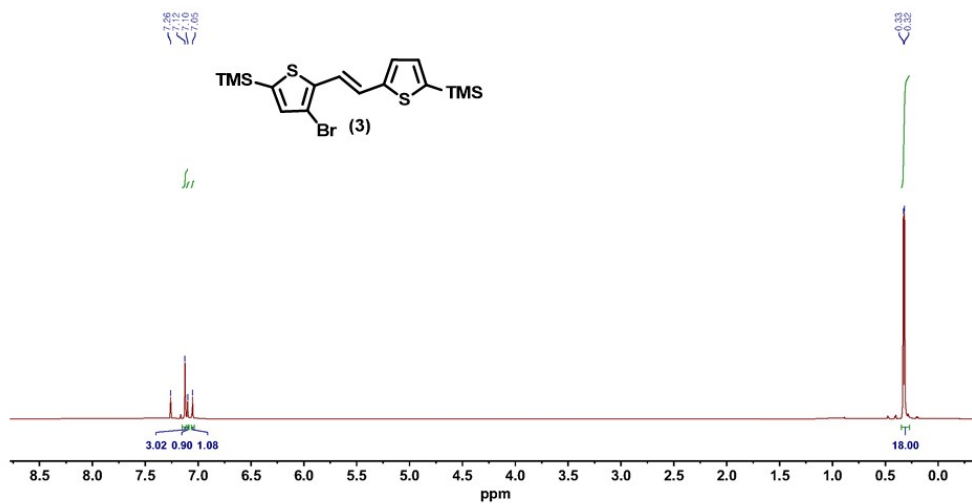

<sup>1</sup>H-NMR spectrum of (3)

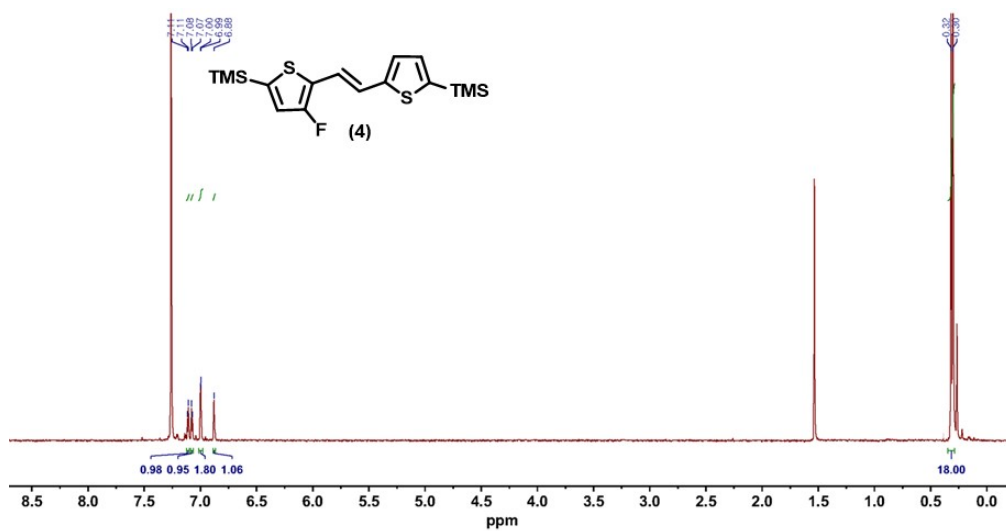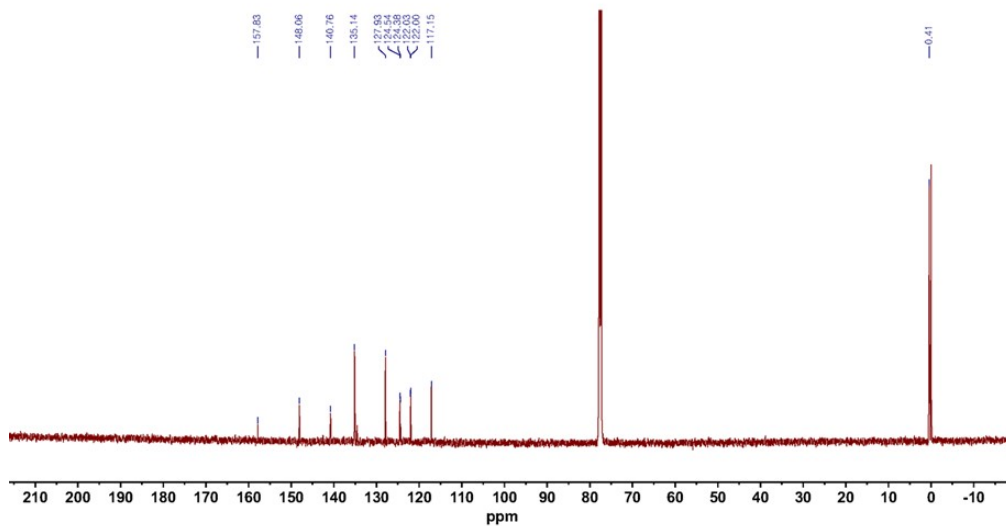

<sup>1</sup>H and <sup>13</sup>C-NMR spectra of (4)

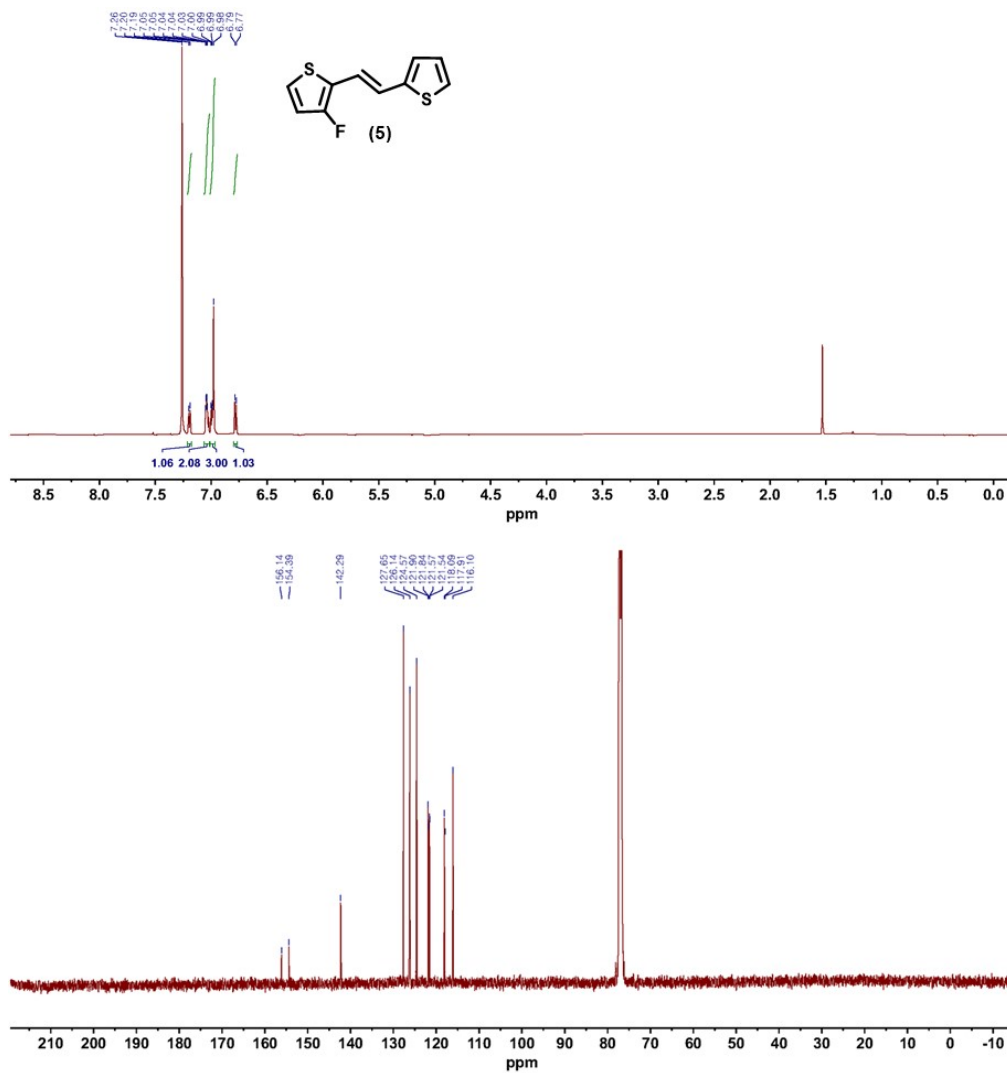

<sup>1</sup>H and <sup>13</sup>C-NMR spectra of (5)

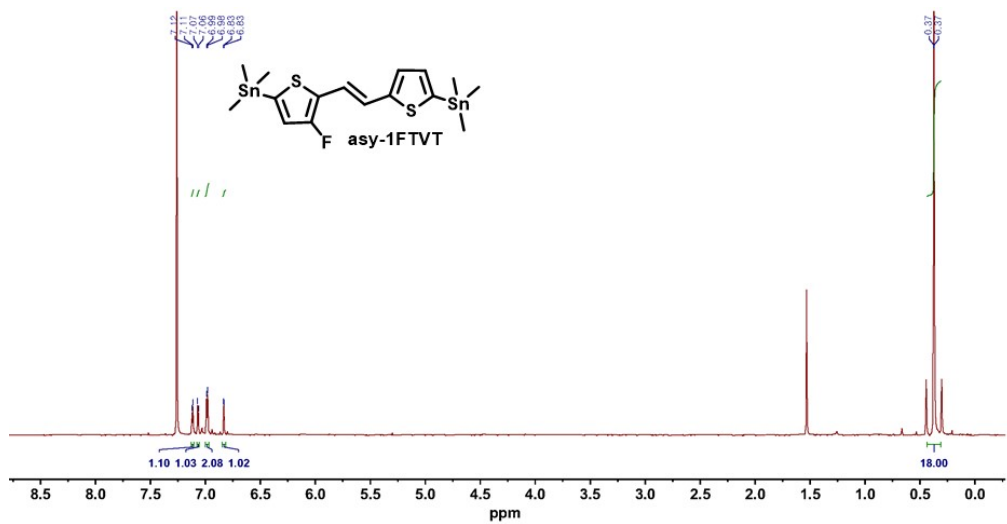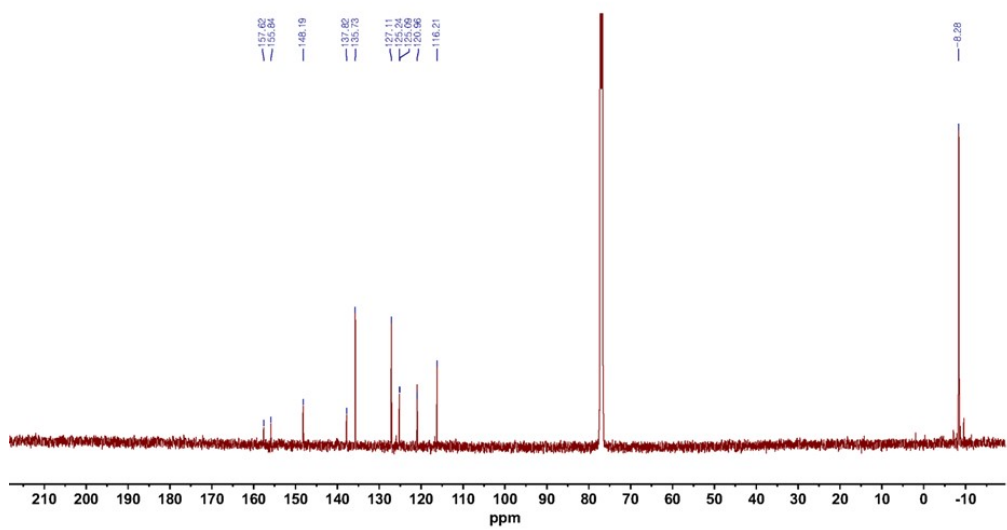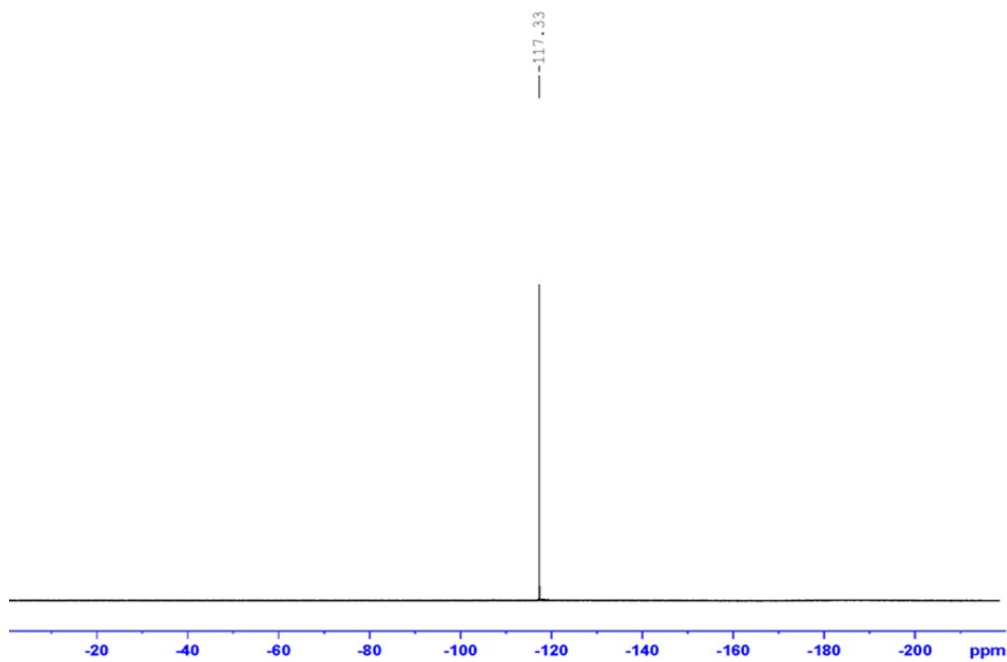

$^1\text{H}$ ,  $^{13}\text{C}$ , and  $^{19}\text{F}$ -NMR spectra of **asy-1FTVT**

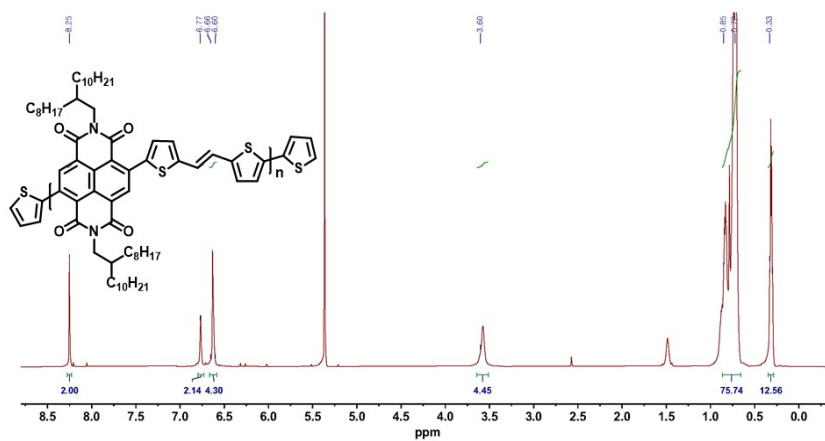

<sup>1</sup>H-NMR spectra of PNDITVT

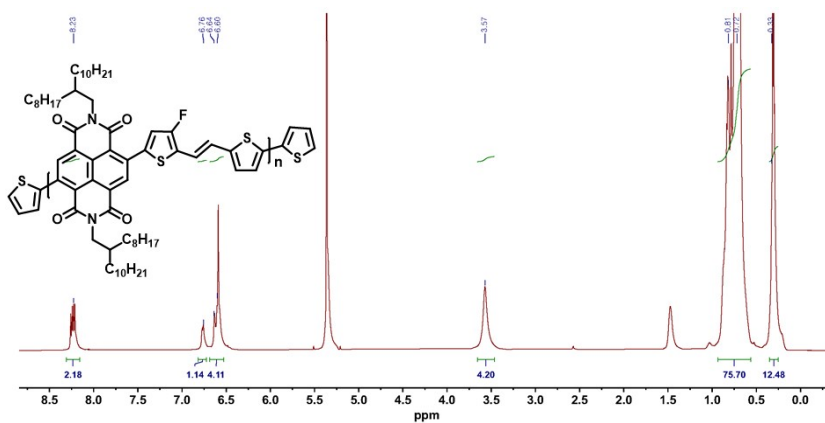

<sup>1</sup>H-NMR spectra of asy-PNDI1FTVT

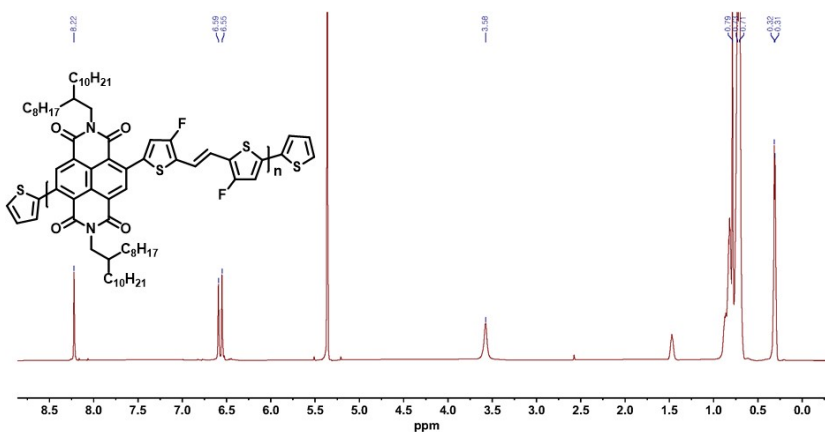

<sup>1</sup>H-NMR spectra of PNDI2FTVT

**Figure S1.** <sup>1</sup>H, <sup>13</sup>C, and <sup>19</sup>F nuclear magnetic resonance (NMR) spectroscopy of all the compounds.



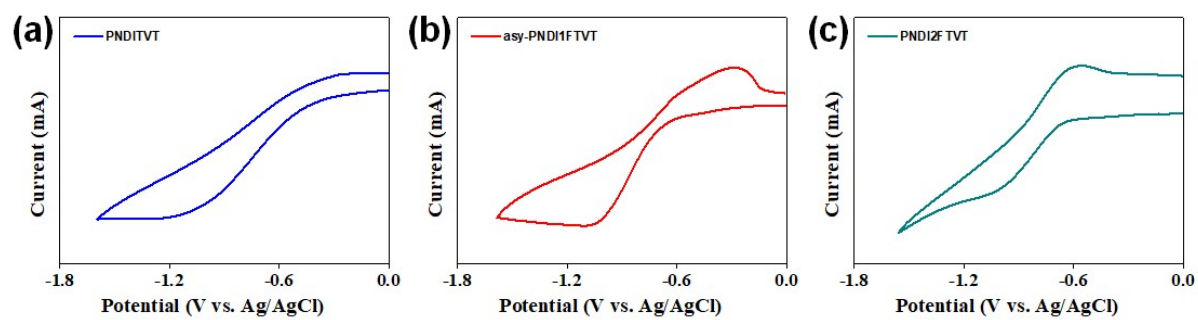

**Figure S2.** Cyclic voltammograms (CV) of the second reduction cycles of (a) **PND1TVT**, (b) **asy-PND11FTVT**, and (c) **PND12FTVT**.

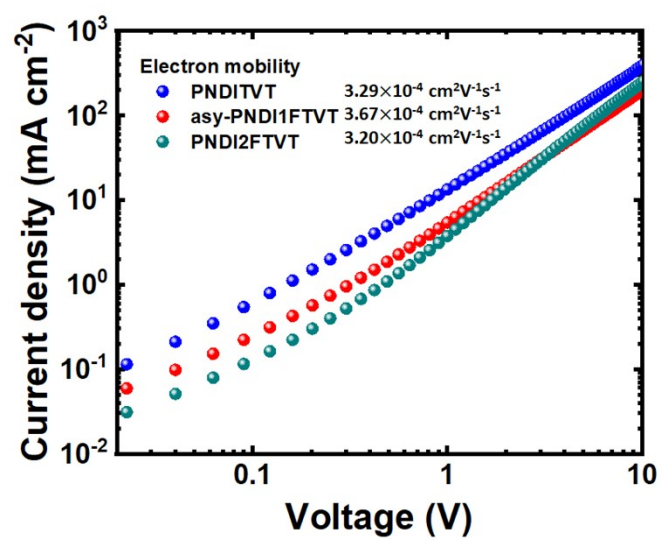

**Figure S3.** Space charge limited current (SCLC) mobility plots of three acceptor polymers.

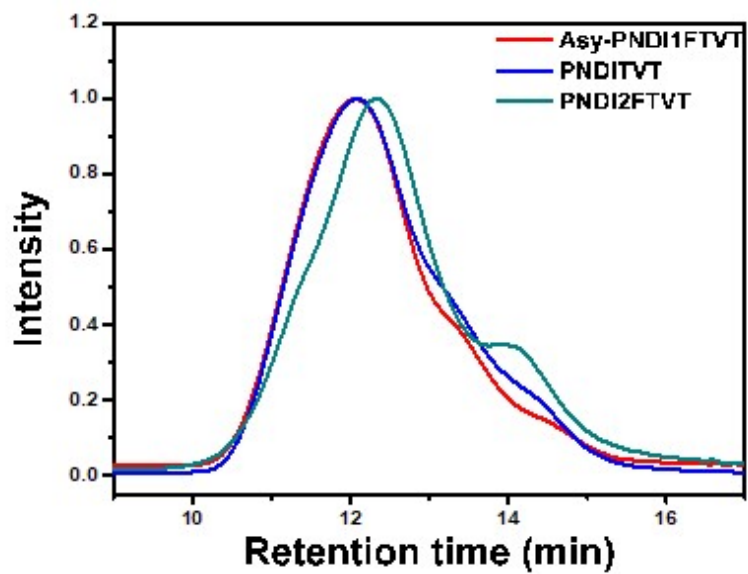

**Figure S4.** Gel permeation chromatographs of PNDITVT, asy-PNDI1FTVT and PNDI2FTVT.

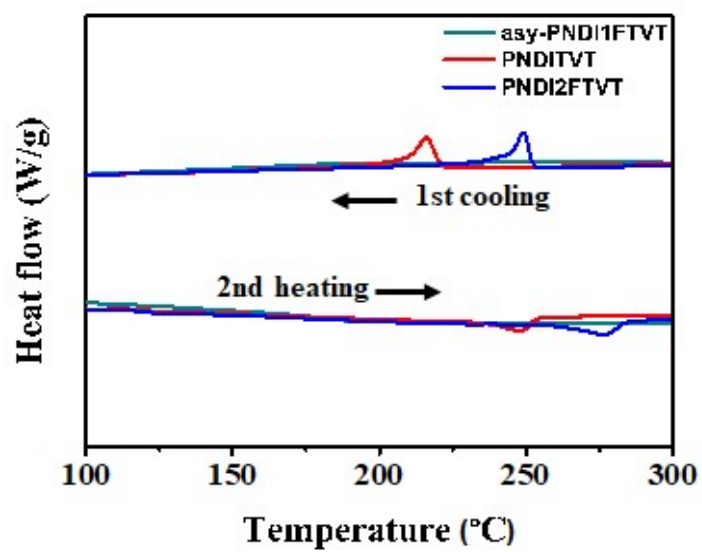

**Figure S5.** Differential Scanning Calorimeter thermograms of three copolymers.

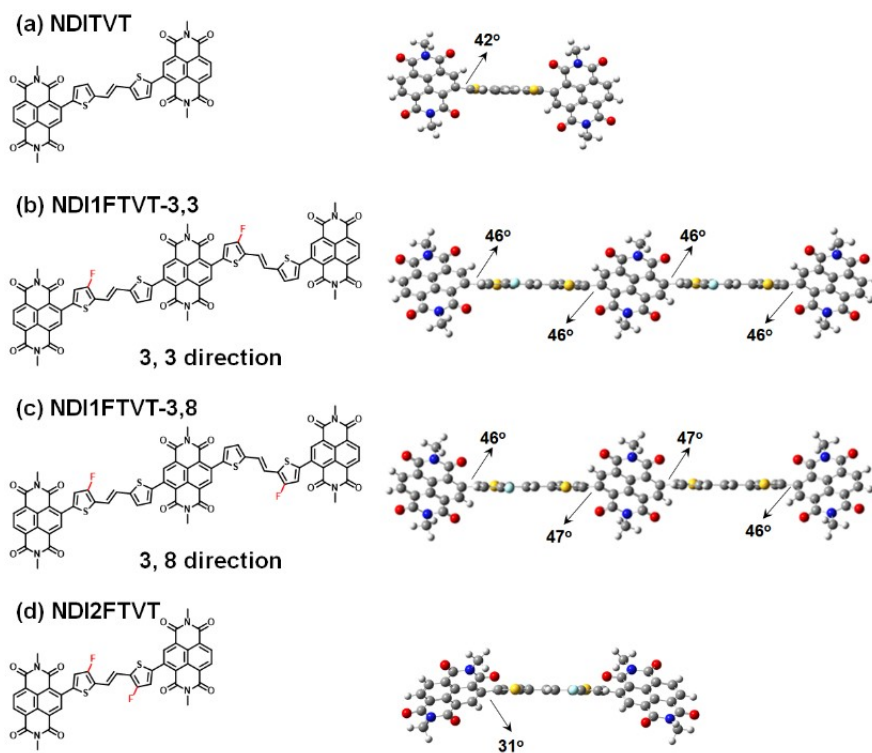

**Figure S6.** Optimized four model compounds (a) **NDITVT** (b) **NDI1FTVT-3,3** containing fluorine atoms at 3,3 positions, (c) **NDI1FTVT-3,8** containing fluorine atoms at 3,8 positions, and (d) **NDI2FTVT**.

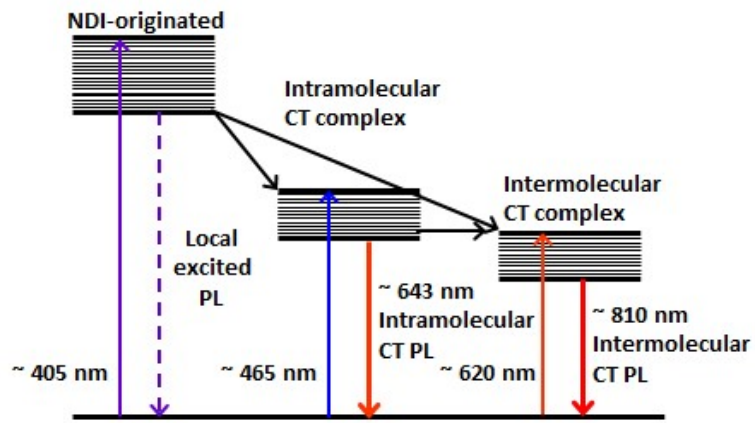

Figure S7. Jablonski diagram of asy-PNDI1FTVT.

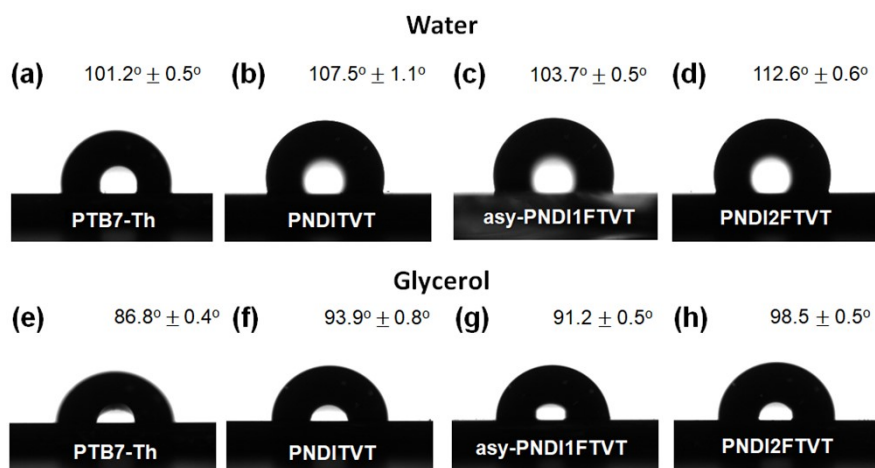

**Figure S8.** Contact angle measurement of PTB7-Th, PNDITVT, asy-PNDI1FTVT, and PNDI2FTVT (average value of 5 drops of each solvent).

## References

1. M. Kim, W.-T. Park, S. U. Ryu, S. Y. Son, J. Lee, T. J. Shin, Y.-Y. Noh and T. Park, *Chem. Mater.*, 2019, **31**, 4864-4872.
